# Supplementary material for: Pyrolysis-free ZIF-67-graphene oxide composite films for improving the sluggish kinetics of the oxygen reduction reaction in a neutral medium
Source: Royal Society of Chemistry journal article supplement (doi:10.1039/d4se00799a), 2024-01-01
Supplement: d4se00799a1.pdf [file d4se00799a1.pdf]

## Supplementary Information

### Pyrolysis-free ZIF-67-Graphene oxide composite films for improving the sluggish kinetics of oxygen reduction reaction in neutral medium

S. Devishree,<sup>1</sup> Sheela Berchmans<sup>1,2,\*</sup> and V. Ganesh<sup>1,2,\*</sup>

<sup>1</sup> *Electrodics and Electrocatalysis (EEC) Division, CSIR – Central Electrochemical Research Institute (CSIR – CECRI), Karaikudi – 630003, Tamil Nadu, India.*

<sup>2</sup> *Academy of Scientific and Industrial Research (AcSIR), Ghaziabad – 201002, India.*

\* Corresponding Author's e-mail ID: [sheelaberchmans@yahoo.com](mailto:sheelaberchmans@yahoo.com) ; [vganesh@cecric.res.in](mailto:vganesh@cecric.res.in) ; [ganelectro@gmail.com](mailto:ganelectro@gmail.com)

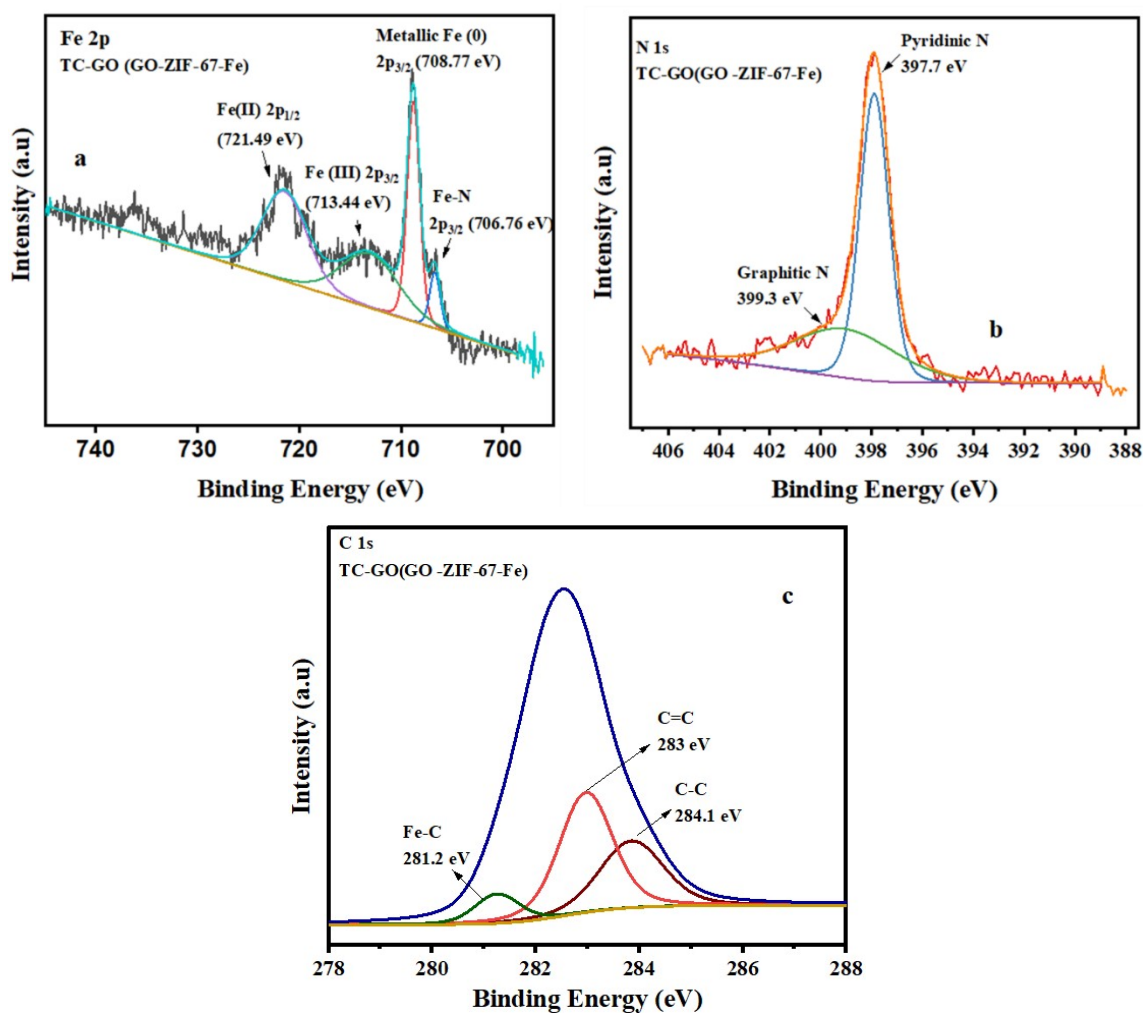

Figure S1: XPS spectra of (a) Fe 2p, (b) N 1s (c) C 1s of TC-GO (GO-ZIF-67-Fe) synthesized using boric acid.

**Table S1: Anodic and cathodic peak current values and its ratio on the scan rate variation of different modifications of ZIF-67**

| <b>Modified ZIF-67</b>      | <b>Scan rate (mV/s)</b> | <b><math>\Delta E_p</math> (mV)</b> | <b><math>I_{pC}</math> (mA)</b> | <b><math>I_{pA}</math> (mA)</b> | <b><math>\frac{I_{pA}}{I_{pC}}</math></b> |
|-----------------------------|-------------------------|-------------------------------------|---------------------------------|---------------------------------|-------------------------------------------|
| <b>Graphene Oxide (GO)</b>  | 5                       | 49.2                                | -0.181638                       | 0.128657                        | 0.7072                                    |
|                             | 10                      | 61.6                                | -0.282468                       | 0.283547                        | 1.0035                                    |
|                             | 20                      | 99.5                                | -0.591434                       | 0.539546                        | 0.9120                                    |
|                             | 50                      | 79.1                                | -0.569460                       | 0.431246                        | 0.7574                                    |
|                             | 100                     | 95.7                                | -0.867547                       | 0.539657                        | 0.6217                                    |
| <b>TC-ZIF-67</b>            | 1                       | 74.6                                | -0.0265814                      | 0.0117279                       | 0.4412                                    |
|                             | 2                       | 77.8                                | -0.0321012                      | 0.0210754                       | 0.65653                                   |
|                             | 3                       | 84.7                                | -0.0411976                      | 0.031321                        | 0.76026                                   |
|                             | 4                       | 98.4                                | -0.0524359                      | 0.0426833                       | 0.81400                                   |
|                             | 5                       | 106.2                               | -0.0700867                      | 0.0549088                       | 0.78344                                   |
| <b>TC-GO (GO-ZIF-67)</b>    | 1                       | 143.4                               | -0.158818                       | 0.17587                         | 1.10737                                   |
|                             | 2                       | 147.9                               | -0.191954                       | 0.21675                         | 1.12918                                   |
|                             | 3                       | 156.0                               | -0.22883                        | 0.32732                         | 1.43041                                   |
|                             | 4                       | 163.8                               | -0.268958                       | 0.32324                         | 1.20182                                   |
|                             | 5                       | 170.0                               | -0.267988                       | 0.33752                         | 1.25946                                   |
| <b>TC-GO (GO-ZIF-67-Fe)</b> | 1                       | 98.4                                | -0.155579                       | 0.082434                        | 0.52985                                   |
|                             | 2                       | 97.3                                | -0.231736                       | 0.157683                        | 0.68044                                   |
|                             | 3                       | 107.3                               | -0.294421                       | 0.239478                        | 0.81338                                   |
|                             | 4                       | 119.8                               | -0.340449                       | 0.305923                        | 0.89859                                   |
|                             | 5                       | 133.5                               | -0.402088                       | 0.30312                         | 0.75386                                   |

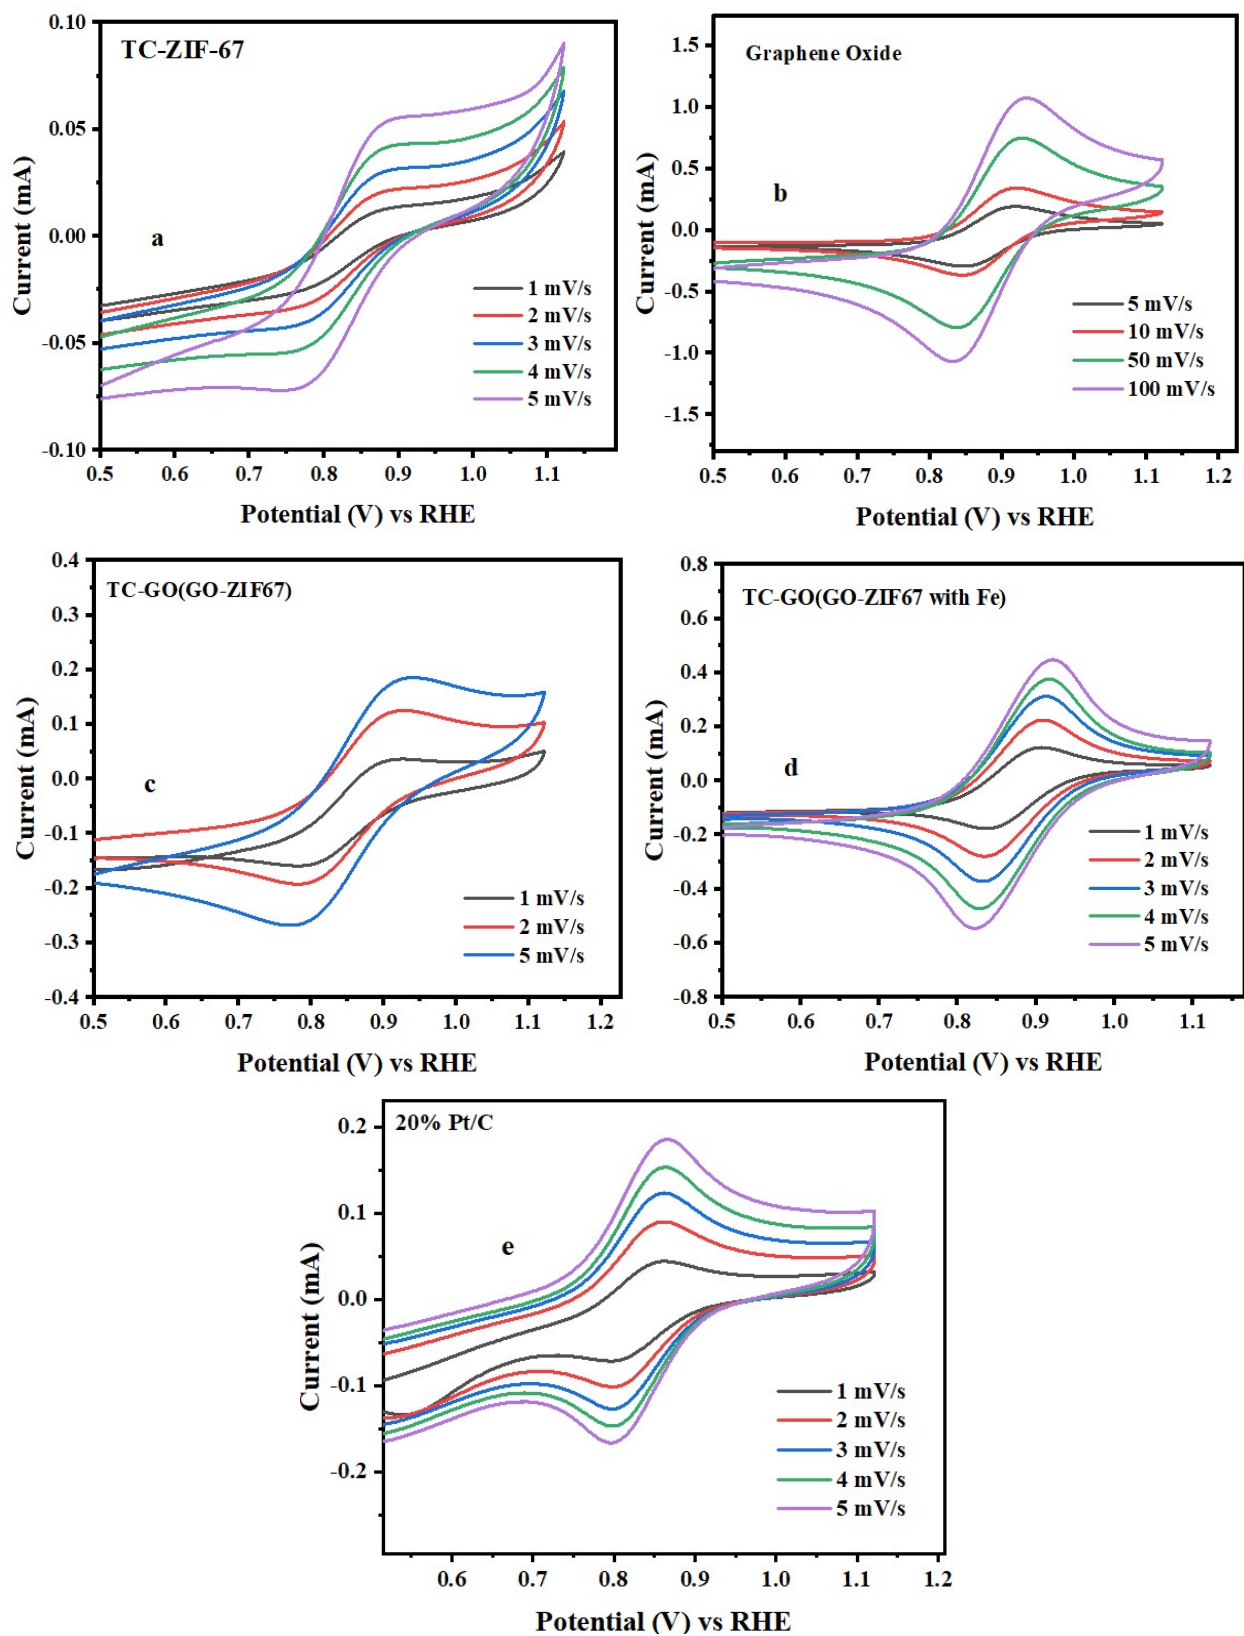

Figure S2: Cyclic voltammograms of (a) TC-ZIF-67, (b) Graphene Oxide (GO), (c) TC-GO (GO-ZIF-67), and (d) Boric acid – TC-GO (GO-ZIF-67-Fe) (e) 20 % Pt/C in 5 mM  $K_3[Fe(CN)_6]$  in 1 M KCl at different scan rates.

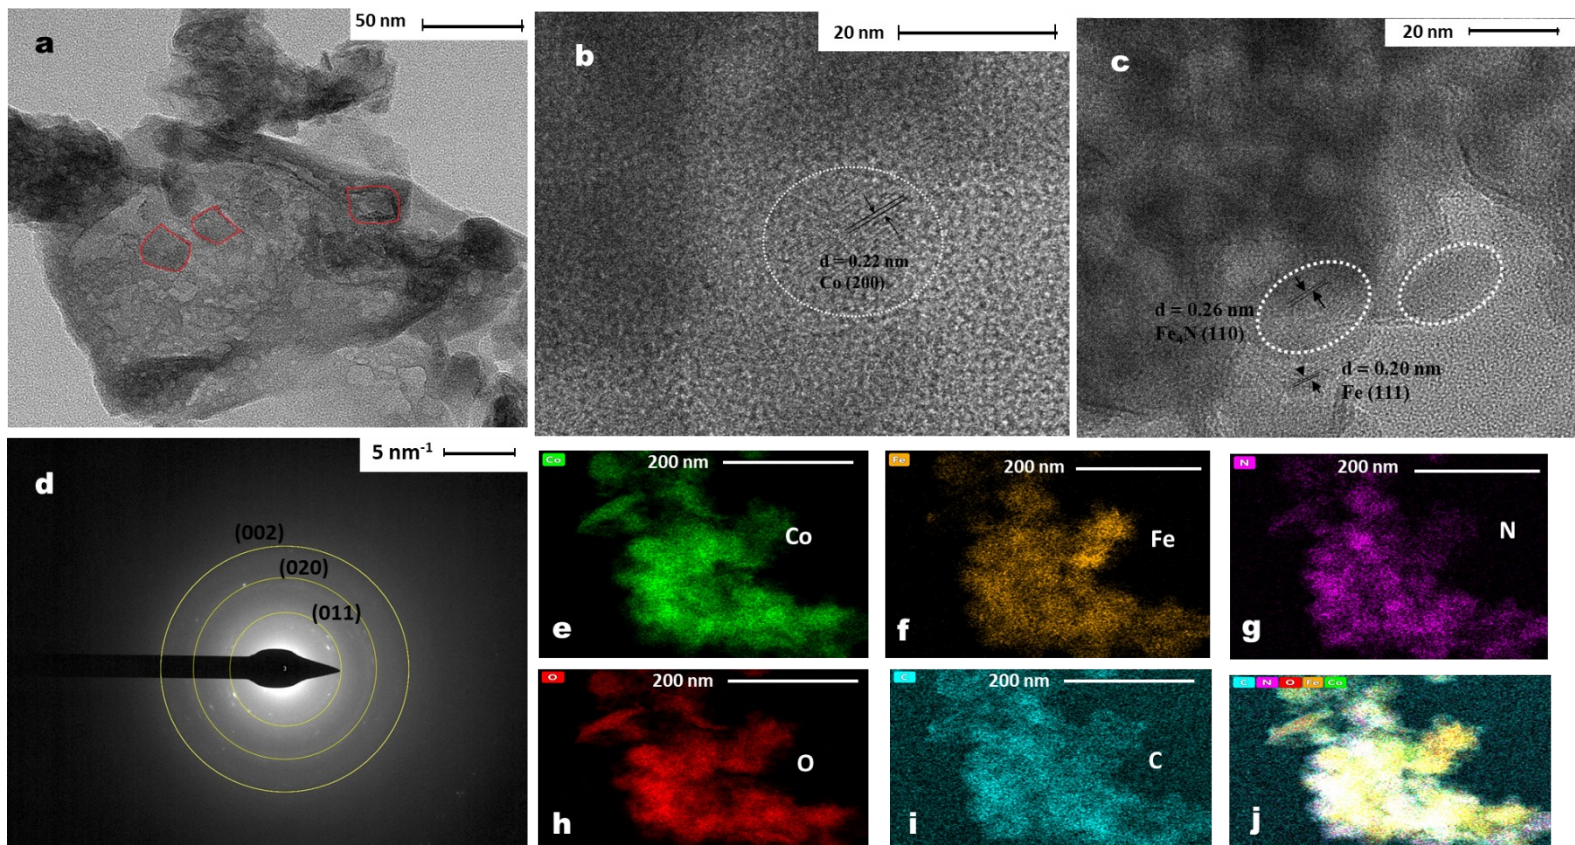

**Figure S3: (a-c) HR-TEM images of TC-GO (GO-ZIF-67-Fe) (d) SAED pattern and (e-j) elemental mapping images of TC-GO (GO-ZIF-67-Fe) containing Co, Fe, N, O, C and all elements combined.**
